# Supplementary material for: Approximating missing epidemiological data for cervical cancer through Footprinting: A case study in India
Source: eLife. 2023 May 25;12:e81752. doi: 10.7554/eLife.81752 (PMC10212556; doi:10.7554/eLife.81752)
Supplement: Figure 2—source data 1. [file elife-81752-fig2-data1.xlsx]

## Sheet: ci5
ci5.registry	age.group	incidence
Ahmedabad	15-19	0
Ahmedabad	20-24	0
Ahmedabad	25-29	0.838364
Ahmedabad	30-34	7.8683
Ahmedabad	35-39	14.0084
Ahmedabad	40-44	24.1595
Ahmedabad	45-49	19.6614
Ahmedabad	50-54	34.4229
Ahmedabad	55-59	19.6198
Ahmedabad	60-64	30.5998
Ahmedabad	65-69	25.7437
Ahmedabad	70-74	30.6058
Ahmedabad	75-79	13.574
Bangalore	15-19	0
Bangalore	20-24	0.185262
Bangalore	25-29	0.914946
Bangalore	30-34	4.85521
Bangalore	35-39	9.9686
Bangalore	40-44	23.819
Bangalore	45-49	40.3855
Bangalore	50-54	52.1888
Bangalore	55-59	63.7157
Bangalore	60-64	63.9984
Bangalore	65-69	79.64
Bangalore	70-74	74.135
Bangalore	75-79	30.1778
Barshi, Paranda, and Bhum	15-19	0
Barshi, Paranda, and Bhum	20-24	0
Barshi, Paranda, and Bhum	25-29	2.20095
Barshi, Paranda, and Bhum	30-34	6.10396
Barshi, Paranda, and Bhum	35-39	18.5073
Barshi, Paranda, and Bhum	40-44	35.9133
Barshi, Paranda, and Bhum	45-49	40.2253
Barshi, Paranda, and Bhum	50-54	55.1467
Barshi, Paranda, and Bhum	55-59	41.7701
Barshi, Paranda, and Bhum	60-64	83.0828
Barshi, Paranda, and Bhum	65-69	87.1912
Barshi, Paranda, and Bhum	70-74	69.4773
Barshi, Paranda, and Bhum	75-79	29.6481
Bhopal	15-19	0.216786
Bhopal	20-24	0.205584
Bhopal	25-29	1.97744
Bhopal	30-34	4.28935
Bhopal	35-39	12.8141
Bhopal	40-44	23.8245
Bhopal	45-49	30.4466
Bhopal	50-54	53.3305
Bhopal	55-59	48.8433
Bhopal	60-64	65.0195
Bhopal	65-69	61.7981
Bhopal	70-74	76.3625
Bhopal	75-79	17.6929
Cachar	15-19	0
Cachar	20-24	0.495864
Cachar	25-29	2.65301
Cachar	30-34	6.6966
Cachar	35-39	12.7729
Cachar	40-44	19.9591
Cachar	45-49	29.4787
Cachar	50-54	35.8292
Cachar	55-59	35.4671
Cachar	60-64	35.6744
Cachar	65-69	42.0345
Cachar	70-74	33.6864
Cachar	75-79	6.80365
Chennai	15-19	0
Chennai	20-24	0.178663
Chennai	25-29	0.57145
Chennai	30-34	2.6068
Chennai	35-39	10.5261
Chennai	40-44	23.4627
Chennai	45-49	36.6736
Chennai	50-54	47.6699
Chennai	55-59	67.5104
Chennai	60-64	76.4565
Chennai	65-69	75.8356
Chennai	70-74	75.1223
Chennai	75-79	27.2524
Dindigul, Ambilikkai	15-19	0
Dindigul, Ambilikkai	20-24	0.695225
Dindigul, Ambilikkai	25-29	1.31185
Dindigul, Ambilikkai	30-34	6.06841
Dindigul, Ambilikkai	35-39	16.1991
Dindigul, Ambilikkai	40-44	44.0355
Dindigul, Ambilikkai	45-49	59.4271
Dindigul, Ambilikkai	50-54	73.8383
Dindigul, Ambilikkai	55-59	70.358
Dindigul, Ambilikkai	60-64	74.4657
Dindigul, Ambilikkai	65-69	58.376
Dindigul, Ambilikkai	70-74	55.0892
Dindigul, Ambilikkai	75-79	12.4614
Kamrup Urban District	15-19	0
Kamrup Urban District	20-24	0
Kamrup Urban District	25-29	1.60748
Kamrup Urban District	30-34	5.50921
Kamrup Urban District	35-39	9.83643
Kamrup Urban District	40-44	15.671
Kamrup Urban District	45-49	28.4258
Kamrup Urban District	50-54	31.0677
Kamrup Urban District	55-59	35.3304
Kamrup Urban District	60-64	42.9979
Kamrup Urban District	65-69	52.5293
Kamrup Urban District	70-74	30.8333
Kamrup Urban District	75-79	25.9909
Kollam	15-19	0
Kollam	20-24	0
Kollam	25-29	0.896893
Kollam	30-34	0.554853
Kollam	35-39	3.25412
Kollam	40-44	8.72738
Kollam	45-49	14.5691
Kollam	50-54	18.9482
Kollam	55-59	29.2629
Kollam	60-64	31.7489
Kollam	65-69	35.1148
Kollam	70-74	34.0274
Kollam	75-79	11.3497
Mizoram	15-19	0
Mizoram	20-24	1.80347
Mizoram	25-29	3.59776
Mizoram	30-34	22.3672
Mizoram	35-39	34.8546
Mizoram	40-44	51.0733
Mizoram	45-49	74.4847
Mizoram	50-54	74.5656
Mizoram	55-59	58.7247
Mizoram	60-64	42.2041
Mizoram	65-69	37.8501
Mizoram	70-74	17.1532
Mizoram	75-79	14.9637
Mumbai	15-19	0
Mumbai	20-24	0.200296
Mumbai	25-29	0.623164
Mumbai	30-34	2.72346
Mumbai	35-39	6.24814
Mumbai	40-44	17.0016
Mumbai	45-49	22.6776
Mumbai	50-54	30.7988
Mumbai	55-59	37.0674
Mumbai	60-64	40.7189
Mumbai	65-69	43.0164
Mumbai	70-74	42.8362
Mumbai	75-79	17.1274
Poona	15-19	0
Poona	20-24	0.177279
Poona	25-29	0.896117
Poona	30-34	1.99668
Poona	35-39	7.70204
Poona	40-44	15.52
Poona	45-49	17.7889
Poona	50-54	28.2725
Poona	55-59	37.8419
Poona	60-64	49.2901
Poona	65-69	34.7268
Poona	70-74	41.0106
Poona	75-79	15.5291
Sikkim State	15-19	0
Sikkim State	20-24	0
Sikkim State	25-29	0.678748
Sikkim State	30-34	4.29712
Sikkim State	35-39	12.0162
Sikkim State	40-44	26.0763
Sikkim State	45-49	28.9988
Sikkim State	50-54	24.5575
Sikkim State	55-59	42.8048
Sikkim State	60-64	26.4866
Sikkim State	65-69	20.7684
Sikkim State	70-74	12.4154
Sikkim State	75-79	0
Tripura	15-19	0
Tripura	20-24	0
Tripura	25-29	0.979787
Tripura	30-34	5.05219
Tripura	35-39	13.1307
Tripura	40-44	14.3577
Tripura	45-49	31.3617
Tripura	50-54	33.9204
Tripura	55-59	32.9
Tripura	60-64	39.6158
Tripura	65-69	24.2239
Tripura	70-74	30.9241
Tripura	75-79	8.74118
Trivandrum	15-19	0
Trivandrum	20-24	0.415655
Trivandrum	25-29	0
Trivandrum	30-34	0
Trivandrum	35-39	1.84256
Trivandrum	40-44	9.68988
Trivandrum	45-49	15.4081
Trivandrum	50-54	19.2908
Trivandrum	55-59	30.7098
Trivandrum	60-64	45.0154
Trivandrum	65-69	28.6726
Trivandrum	70-74	44.6701
Trivandrum	75-79	11.9511
Wardha	15-19	0
Wardha	20-24	0.55114
Wardha	25-29	0
Wardha	30-34	2.6892
Wardha	35-39	6.67762
Wardha	40-44	12.8239
Wardha	45-49	19.5531
Wardha	50-54	31.6356
Wardha	55-59	17.192
Wardha	60-64	25.0537
Wardha	65-69	23.2085
Wardha	70-74	25.6203
Wardha	75-79	6.348

## Sheet: ncdir
data.source	registry	age.group	incidence.per.100thousand.women.years
ncdir	Aizawl district	15-19	0
ncdir	Aizawl district	20-24	0.9
ncdir	Aizawl district	25-29	2.7
ncdir	Aizawl district	30-34	18.6
ncdir	Aizawl district	35-39	48
ncdir	Aizawl district	40-44	102.3
ncdir	Aizawl district	45-49	73.5
ncdir	Aizawl district	50-54	101.6
ncdir	Aizawl district	55-59	68.4
ncdir	Aizawl district	60-64	77.4
ncdir	Aizawl district	65-69	22.5
ncdir	Aizawl district	70-74	29.7
ncdir	Aizawl district	75-79	20.4
ncdir	Aurangabad	15-19	0
ncdir	Aurangabad	20-24	0.8
ncdir	Aurangabad	25-29	1.9
ncdir	Aurangabad	30-34	4.1
ncdir	Aurangabad	35-39	13.3
ncdir	Aurangabad	40-44	24.5
ncdir	Aurangabad	45-49	33.6
ncdir	Aurangabad	50-54	28.9
ncdir	Aurangabad	55-59	47.3
ncdir	Aurangabad	60-64	51.8
ncdir	Aurangabad	65-69	77.2
ncdir	Aurangabad	70-74	51.4
ncdir	Aurangabad	75-79	34.9
ncdir	Delhi	15-19	0
ncdir	Delhi	20-24	0.5
ncdir	Delhi	25-29	1.2
ncdir	Delhi	30-34	4.4
ncdir	Delhi	35-39	11.3
ncdir	Delhi	40-44	21.9
ncdir	Delhi	45-49	32.4
ncdir	Delhi	50-54	38.6
ncdir	Delhi	55-59	45.4
ncdir	Delhi	60-64	62.3
ncdir	Delhi	65-69	57.1
ncdir	Delhi	70-74	51.5
ncdir	Delhi	75-79	32
ncdir	Dibrugarh district	15-19	0
ncdir	Dibrugarh district	20-24	0
ncdir	Dibrugarh district	25-29	0.3
ncdir	Dibrugarh district	30-34	2.9
ncdir	Dibrugarh district	35-39	1.1
ncdir	Dibrugarh district	40-44	9.9
ncdir	Dibrugarh district	45-49	14.3
ncdir	Dibrugarh district	50-54	16.8
ncdir	Dibrugarh district	55-59	13.8
ncdir	Dibrugarh district	60-64	20.8
ncdir	Dibrugarh district	65-69	13.6
ncdir	Dibrugarh district	70-74	12
ncdir	Dibrugarh district	75-79	9.1
ncdir	East Khasi Hills district	15-19	0
ncdir	East Khasi Hills district	20-24	0.8
ncdir	East Khasi Hills district	25-29	1
ncdir	East Khasi Hills district	30-34	6.1
ncdir	East Khasi Hills district	35-39	6
ncdir	East Khasi Hills district	40-44	18
ncdir	East Khasi Hills district	45-49	29.2
ncdir	East Khasi Hills district	50-54	35.9
ncdir	East Khasi Hills district	55-59	30.9
ncdir	East Khasi Hills district	60-64	18.3
ncdir	East Khasi Hills district	65-69	34.8
ncdir	East Khasi Hills district	70-74	16.7
ncdir	East Khasi Hills district	75-79	28.1
ncdir	Hyderabad district	15-19	0
ncdir	Hyderabad district	20-24	0.1
ncdir	Hyderabad district	25-29	1.5
ncdir	Hyderabad district	30-34	3.7
ncdir	Hyderabad district	35-39	11.2
ncdir	Hyderabad district	40-44	15.8
ncdir	Hyderabad district	45-49	20.3
ncdir	Hyderabad district	50-54	35.2
ncdir	Hyderabad district	55-59	44.7
ncdir	Hyderabad district	60-64	51.1
ncdir	Hyderabad district	65-69	43.8
ncdir	Hyderabad district	70-74	55.8
ncdir	Hyderabad district	75-79	25.6
ncdir	Imphal West district	15-19	0
ncdir	Imphal West district	20-24	0.8
ncdir	Imphal West district	25-29	0
ncdir	Imphal West district	30-34	4.9
ncdir	Imphal West district	35-39	7.9
ncdir	Imphal West district	40-44	14.5
ncdir	Imphal West district	45-49	16.7
ncdir	Imphal West district	50-54	24.6
ncdir	Imphal West district	55-59	26.9
ncdir	Imphal West district	60-64	43.7
ncdir	Imphal West district	65-69	38.3
ncdir	Imphal West district	70-74	47.5
ncdir	Imphal West district	75-79	28.5
ncdir	Kolkata	15-19	0
ncdir	Kolkata	20-24	0.3
ncdir	Kolkata	25-29	0.5
ncdir	Kolkata	30-34	3.4
ncdir	Kolkata	35-39	6.3
ncdir	Kolkata	40-44	16
ncdir	Kolkata	45-49	23.8
ncdir	Kolkata	50-54	27.5
ncdir	Kolkata	55-59	26.8
ncdir	Kolkata	60-64	29
ncdir	Kolkata	65-69	35
ncdir	Kolkata	70-74	31.7
ncdir	Kolkata	75-79	21.3
ncdir	Manipur state	15-19	0
ncdir	Manipur state	20-24	0.3
ncdir	Manipur state	25-29	0.3
ncdir	Manipur state	30-34	3.4
ncdir	Manipur state	35-39	6.8
ncdir	Manipur state	40-44	10
ncdir	Manipur state	45-49	13
ncdir	Manipur state	50-54	17.7
ncdir	Manipur state	55-59	23.1
ncdir	Manipur state	60-64	26.4
ncdir	Manipur state	65-69	27.2
ncdir	Manipur state	70-74	31.9
ncdir	Manipur state	75-79	17.7
ncdir	Meghalaya	15-19	0
ncdir	Meghalaya	20-24	0.4
ncdir	Meghalaya	25-29	1.8
ncdir	Meghalaya	30-34	6.7
ncdir	Meghalaya	35-39	8.5
ncdir	Meghalaya	40-44	18.5
ncdir	Meghalaya	45-49	28.4
ncdir	Meghalaya	50-54	26.5
ncdir	Meghalaya	55-59	30.9
ncdir	Meghalaya	60-64	21.8
ncdir	Meghalaya	65-69	28.5
ncdir	Meghalaya	70-74	12.7
ncdir	Meghalaya	75-79	16.6
ncdir	Nagaland	15-19	0
ncdir	Nagaland	20-24	1
ncdir	Nagaland	25-29	3.3
ncdir	Nagaland	30-34	7.2
ncdir	Nagaland	35-39	17.1
ncdir	Nagaland	40-44	30.9
ncdir	Nagaland	45-49	47.9
ncdir	Nagaland	50-54	43.9
ncdir	Nagaland	55-59	35.4
ncdir	Nagaland	60-64	39.1
ncdir	Nagaland	65-69	37.3
ncdir	Nagaland	70-74	16
ncdir	Nagaland	75-79	10.5
ncdir	Nagpur	15-19	0
ncdir	Nagpur	20-24	0.9
ncdir	Nagpur	25-29	1.6
ncdir	Nagpur	30-34	4.3
ncdir	Nagpur	35-39	11.8
ncdir	Nagpur	40-44	20.5
ncdir	Nagpur	45-49	26.8
ncdir	Nagpur	50-54	30.7
ncdir	Nagpur	55-59	34.9
ncdir	Nagpur	60-64	47.5
ncdir	Nagpur	65-69	44.2
ncdir	Nagpur	70-74	32.1
ncdir	Nagpur	75-79	24.8
ncdir	Osamanabad & Beed	15-19	0
ncdir	Osamanabad & Beed	20-24	0.4
ncdir	Osamanabad & Beed	25-29	1.8
ncdir	Osamanabad & Beed	30-34	4.5
ncdir	Osamanabad & Beed	35-39	11.5
ncdir	Osamanabad & Beed	40-44	19.7
ncdir	Osamanabad & Beed	45-49	29.1
ncdir	Osamanabad & Beed	50-54	42.7
ncdir	Osamanabad & Beed	55-59	41.1
ncdir	Osamanabad & Beed	60-64	56.4
ncdir	Osamanabad & Beed	65-69	52.2
ncdir	Osamanabad & Beed	70-74	41.4
ncdir	Osamanabad & Beed	75-79	28.7
ncdir	Papumpare district	15-19	0
ncdir	Papumpare district	20-24	1.6
ncdir	Papumpare district	25-29	2
ncdir	Papumpare district	30-34	10.2
ncdir	Papumpare district	35-39	22.4
ncdir	Papumpare district	40-44	44.3
ncdir	Papumpare district	45-49	55.5
ncdir	Papumpare district	50-54	87.7
ncdir	Papumpare district	55-59	109.4
ncdir	Papumpare district	60-64	109.2
ncdir	Papumpare district	65-69	73.5
ncdir	Papumpare district	70-74	205.9
ncdir	Papumpare district	75-79	0
ncdir	Pasighat	15-19	0
ncdir	Pasighat	20-24	2.8
ncdir	Pasighat	25-29	0
ncdir	Pasighat	30-34	11.2
ncdir	Pasighat	35-39	19.4
ncdir	Pasighat	40-44	67.9
ncdir	Pasighat	45-49	88
ncdir	Pasighat	50-54	45.5
ncdir	Pasighat	55-59	70.1
ncdir	Pasighat	60-64	45.6
ncdir	Pasighat	65-69	16.9
ncdir	Pasighat	70-74	25.5
ncdir	Pasighat	75-79	50
ncdir	Patiala district	15-19	0
ncdir	Patiala district	20-24	0.2
ncdir	Patiala district	25-29	2.2
ncdir	Patiala district	30-34	2.9
ncdir	Patiala district	35-39	13
ncdir	Patiala district	40-44	23.8
ncdir	Patiala district	45-49	32.2
ncdir	Patiala district	50-54	47.3
ncdir	Patiala district	55-59	47.8
ncdir	Patiala district	60-64	48.8
ncdir	Patiala district	65-69	53
ncdir	Patiala district	70-74	35.1
ncdir	Patiala district	75-79	33.1
ncdir	West Arunachal	15-19	0
ncdir	West Arunachal	20-24	0.5
ncdir	West Arunachal	25-29	2.1
ncdir	West Arunachal	30-34	8.5
ncdir	West Arunachal	35-39	13.5
ncdir	West Arunachal	40-44	21.2
ncdir	West Arunachal	45-49	21.9
ncdir	West Arunachal	50-54	39.1
ncdir	West Arunachal	55-59	32.6
ncdir	West Arunachal	60-64	36.8
ncdir	West Arunachal	65-69	11.1
ncdir	West Arunachal	70-74	40.9
ncdir	West Arunachal	75-79	0
ci5	Ahmedabad	15-19	0
ci5	Ahmedabad	20-24	0
ci5	Ahmedabad	25-29	0.838364
ci5	Ahmedabad	30-34	7.8683
ci5	Ahmedabad	35-39	14.0084
ci5	Ahmedabad	40-44	24.1595
ci5	Ahmedabad	45-49	19.6614
ci5	Ahmedabad	50-54	34.4229
ci5	Ahmedabad	55-59	19.6198
ci5	Ahmedabad	60-64	30.5998
ci5	Ahmedabad	65-69	25.7437
ci5	Ahmedabad	70-74	30.6058
ci5	Ahmedabad	75-79	13.574
ci5	Bangalore	15-19	0
ci5	Bangalore	20-24	0.185262
ci5	Bangalore	25-29	0.914946
ci5	Bangalore	30-34	4.85521
ci5	Bangalore	35-39	9.9686
ci5	Bangalore	40-44	23.819
ci5	Bangalore	45-49	40.3855
ci5	Bangalore	50-54	52.1888
ci5	Bangalore	55-59	63.7157
ci5	Bangalore	60-64	63.9984
ci5	Bangalore	65-69	79.64
ci5	Bangalore	70-74	74.135
ci5	Bangalore	75-79	30.1778
ci5	Barshi, Paranda, and Bhum	15-19	0
ci5	Barshi, Paranda, and Bhum	20-24	0
ci5	Barshi, Paranda, and Bhum	25-29	2.20095
ci5	Barshi, Paranda, and Bhum	30-34	6.10396
ci5	Barshi, Paranda, and Bhum	35-39	18.5073
ci5	Barshi, Paranda, and Bhum	40-44	35.9133
ci5	Barshi, Paranda, and Bhum	45-49	40.2253
ci5	Barshi, Paranda, and Bhum	50-54	55.1467
ci5	Barshi, Paranda, and Bhum	55-59	41.7701
ci5	Barshi, Paranda, and Bhum	60-64	83.0828
ci5	Barshi, Paranda, and Bhum	65-69	87.1912
ci5	Barshi, Paranda, and Bhum	70-74	69.4773
ci5	Barshi, Paranda, and Bhum	75-79	29.6481
ci5	Bhopal	15-19	0.216786
ci5	Bhopal	20-24	0.205584
ci5	Bhopal	25-29	1.97744
ci5	Bhopal	30-34	4.28935
ci5	Bhopal	35-39	12.8141
ci5	Bhopal	40-44	23.8245
ci5	Bhopal	45-49	30.4466
ci5	Bhopal	50-54	53.3305
ci5	Bhopal	55-59	48.8433
ci5	Bhopal	60-64	65.0195
ci5	Bhopal	65-69	61.7981
ci5	Bhopal	70-74	76.3625
ci5	Bhopal	75-79	17.6929
ci5	Cachar	15-19	0
ci5	Cachar	20-24	0.495864
ci5	Cachar	25-29	2.65301
ci5	Cachar	30-34	6.6966
ci5	Cachar	35-39	12.7729
ci5	Cachar	40-44	19.9591
ci5	Cachar	45-49	29.4787
ci5	Cachar	50-54	35.8292
ci5	Cachar	55-59	35.4671
ci5	Cachar	60-64	35.6744
ci5	Cachar	65-69	42.0345
ci5	Cachar	70-74	33.6864
ci5	Cachar	75-79	6.80365
ci5	Chennai	15-19	0
ci5	Chennai	20-24	0.178663
ci5	Chennai	25-29	0.57145
ci5	Chennai	30-34	2.6068
ci5	Chennai	35-39	10.5261
ci5	Chennai	40-44	23.4627
ci5	Chennai	45-49	36.6736
ci5	Chennai	50-54	47.6699
ci5	Chennai	55-59	67.5104
ci5	Chennai	60-64	76.4565
ci5	Chennai	65-69	75.8356
ci5	Chennai	70-74	75.1223
ci5	Chennai	75-79	27.2524
ci5	Dindigul, Ambilikkai	15-19	0
ci5	Dindigul, Ambilikkai	20-24	0.695225
ci5	Dindigul, Ambilikkai	25-29	1.31185
ci5	Dindigul, Ambilikkai	30-34	6.06841
ci5	Dindigul, Ambilikkai	35-39	16.1991
ci5	Dindigul, Ambilikkai	40-44	44.0355
ci5	Dindigul, Ambilikkai	45-49	59.4271
ci5	Dindigul, Ambilikkai	50-54	73.8383
ci5	Dindigul, Ambilikkai	55-59	70.358
ci5	Dindigul, Ambilikkai	60-64	74.4657
ci5	Dindigul, Ambilikkai	65-69	58.376
ci5	Dindigul, Ambilikkai	70-74	55.0892
ci5	Dindigul, Ambilikkai	75-79	12.4614
ci5	Kamrup Urban District	15-19	0
ci5	Kamrup Urban District	20-24	0
ci5	Kamrup Urban District	25-29	1.60748
ci5	Kamrup Urban District	30-34	5.50921
ci5	Kamrup Urban District	35-39	9.83643
ci5	Kamrup Urban District	40-44	15.671
ci5	Kamrup Urban District	45-49	28.4258
ci5	Kamrup Urban District	50-54	31.0677
ci5	Kamrup Urban District	55-59	35.3304
ci5	Kamrup Urban District	60-64	42.9979
ci5	Kamrup Urban District	65-69	52.5293
ci5	Kamrup Urban District	70-74	30.8333
ci5	Kamrup Urban District	75-79	25.9909
ci5	Kollam	15-19	0
ci5	Kollam	20-24	0
ci5	Kollam	25-29	0.896893
ci5	Kollam	30-34	0.554853
ci5	Kollam	35-39	3.25412
ci5	Kollam	40-44	8.72738
ci5	Kollam	45-49	14.5691
ci5	Kollam	50-54	18.9482
ci5	Kollam	55-59	29.2629
ci5	Kollam	60-64	31.7489
ci5	Kollam	65-69	35.1148
ci5	Kollam	70-74	34.0274
ci5	Kollam	75-79	11.3497
ci5	Mizoram	15-19	0
ci5	Mizoram	20-24	1.80347
ci5	Mizoram	25-29	3.59776
ci5	Mizoram	30-34	22.3672
ci5	Mizoram	35-39	34.8546
ci5	Mizoram	40-44	51.0733
ci5	Mizoram	45-49	74.4847
ci5	Mizoram	50-54	74.5656
ci5	Mizoram	55-59	58.7247
ci5	Mizoram	60-64	42.2041
ci5	Mizoram	65-69	37.8501
ci5	Mizoram	70-74	17.1532
ci5	Mizoram	75-79	14.9637
ci5	Mumbai	15-19	0
ci5	Mumbai	20-24	0.200296
ci5	Mumbai	25-29	0.623164
ci5	Mumbai	30-34	2.72346
ci5	Mumbai	35-39	6.24814
ci5	Mumbai	40-44	17.0016
ci5	Mumbai	45-49	22.6776
ci5	Mumbai	50-54	30.7988
ci5	Mumbai	55-59	37.0674
ci5	Mumbai	60-64	40.7189
ci5	Mumbai	65-69	43.0164
ci5	Mumbai	70-74	42.8362
ci5	Mumbai	75-79	17.1274
ci5	Poona	15-19	0
ci5	Poona	20-24	0.177279
ci5	Poona	25-29	0.896117
ci5	Poona	30-34	1.99668
ci5	Poona	35-39	7.70204
ci5	Poona	40-44	15.52
ci5	Poona	45-49	17.7889
ci5	Poona	50-54	28.2725
ci5	Poona	55-59	37.8419
ci5	Poona	60-64	49.2901
ci5	Poona	65-69	34.7268
ci5	Poona	70-74	41.0106
ci5	Poona	75-79	15.5291
ci5	Sikkim State	15-19	0
ci5	Sikkim State	20-24	0
ci5	Sikkim State	25-29	0.678748
ci5	Sikkim State	30-34	4.29712
ci5	Sikkim State	35-39	12.0162
ci5	Sikkim State	40-44	26.0763
ci5	Sikkim State	45-49	28.9988
ci5	Sikkim State	50-54	24.5575
ci5	Sikkim State	55-59	42.8048
ci5	Sikkim State	60-64	26.4866
ci5	Sikkim State	65-69	20.7684
ci5	Sikkim State	70-74	12.4154
ci5	Sikkim State	75-79	0
ci5	Tripura	15-19	0
ci5	Tripura	20-24	0
ci5	Tripura	25-29	0.979787
ci5	Tripura	30-34	5.05219
ci5	Tripura	35-39	13.1307
ci5	Tripura	40-44	14.3577
ci5	Tripura	45-49	31.3617
ci5	Tripura	50-54	33.9204
ci5	Tripura	55-59	32.9
ci5	Tripura	60-64	39.6158
ci5	Tripura	65-69	24.2239
ci5	Tripura	70-74	30.9241
ci5	Tripura	75-79	8.74118
ci5	Trivandrum	15-19	0
ci5	Trivandrum	20-24	0.415655
ci5	Trivandrum	25-29	0
ci5	Trivandrum	30-34	0
ci5	Trivandrum	35-39	1.84256
ci5	Trivandrum	40-44	9.68988
ci5	Trivandrum	45-49	15.4081
ci5	Trivandrum	50-54	19.2908
ci5	Trivandrum	55-59	30.7098
ci5	Trivandrum	60-64	45.0154
ci5	Trivandrum	65-69	28.6726
ci5	Trivandrum	70-74	44.6701
ci5	Trivandrum	75-79	11.9511
ci5	Wardha	15-19	0
ci5	Wardha	20-24	0.55114
ci5	Wardha	25-29	0
ci5	Wardha	30-34	2.6892
ci5	Wardha	35-39	6.67762
ci5	Wardha	40-44	12.8239
ci5	Wardha	45-49	19.5531
ci5	Wardha	50-54	31.6356
ci5	Wardha	55-59	17.192
ci5	Wardha	60-64	25.0537
ci5	Wardha	65-69	23.2085
ci5	Wardha	70-74	25.6203
ci5	Wardha	75-79	6.348
