# Supplementary material for: Approximating missing epidemiological data for cervical cancer through Footprinting: A case study in India
Source: eLife. 2023 May 25;12:e81752. doi: 10.7554/eLife.81752 (PMC10212556; doi:10.7554/eLife.81752)
Supplement: Figure 3—source data 1. [file elife-81752-fig3-data1.xlsx]

## Sheet: Median age of first sex
state	Urban.M	Urban.F	Rural.M	Rural.F
Andhra Pradesh	21	17	20	16
Assam	25	20	24	19
Bihar	19	16	18	16
Chhattisgarh	21	18	20	17
Delhi	20	20	20	18
Goa + Daman & Diu	25	22	24	21
Gujarat + Dadra & Nagar Haveli	22	18	21	17
Haryana	20	18	20	17
Himachal Pradesh	20	19	20	18
Jammu & Kashmir	22	20	20	19
Jharkhand	22	18	21	17
Karnataka	25	20	24	19
Kerala + Lakshadweep	25	20	23	19
Madhya Pradesh	20	18	18	17
Maharashtra	20	18	20	18
Manipur	25	22	22	20
Orissa	24	18	20	17
Other North Eastern States	22	20	21	19
Punjab + Chandigarh	20	20	20	19
Rajasthan	20	18	19	16
Sikkim	20	19	21	19
Tamil Nadu + Puducherry	21	19	20	19
Uttar Pradesh	20	18	18	17
Uttarakhand	22	19	21	18
West Bengal + Andaman & Nicobar Islands	22	18	22	17

## Sheet: Proportion non-regular partners
state	Urban.M	Urban.F	Rural.M	Rural.F
Andhra Pradesh	7.9	9.7	26.4	8.9
Assam	5.1	2.1	5.3	1.1
Bihar	2.8	0.1	3.9	0
Chhattisgarh	5.6	1.5	4.5	0.4
Delhi	14.9	3.6	7.7	0.6
Goa + Daman & Diu	12.5	0.7	9.5	0.6
Gujarat + Dadra & Nagar Haveli	8.9	2.9	6.4	1.8
Haryana	6	0.5	6.1	1.2
Himachal Pradesh	7.5	0.1	5.5	0.5
Jammu & Kashmir	5.8	0.6	6.1	0.5
Jharkhand	4.4	1.8	3	1.6
Karnataka	3.6	1.8	2.8	0.2
Kerala + Lakshadweep	8.6	5.1	7.9	4.2
Madhya Pradesh	14.8	0.9	6.3	0.1
Maharashtra	12.4	7	9.7	3.7
Manipur	2.6	0.3	5.2	2.8
Orissa	2.5	0.9	7.6	5
Other North Eastern States	8.2	9.8	10.3	8.6
Punjab + Chandigarh	18.9	7.6	12.8	2.1
Rajasthan	7.5	2.1	8.1	1.3
Sikkim	10.7	2.1	4.6	0.5
Tamil Nadu + Puducherry	15.2	5.8	15.5	6.8
Uttar Pradesh	5.8	0.3	10.3	0.4
Uttarakhand	5	0	4.3	0
West Bengal + Andaman & Nicobar Islands	7.4	0.7	2.8	0.2

## Sheet: Proportion commercial partners
state	Urban	Rural
Andhra Pradesh	7.7	22.7
Assam	2.7	2.8
Bihar	0.9	1.5
Chhattisgarh	2.9	0.7
Delhi	5.8	6.8
Goa + Daman & Diu	4.9	0
Gujarat + Dadra & Nagar Haveli	4.7	2.1
Haryana	3.1	2
Himachal Pradesh	1.2	0.7
Jammu & Kashmir	0.5	1.3
Jharkhand	4.3	1.9
Karnataka	4.2	2.3
Kerala + Lakshadweep	6.4	4.2
Madhya Pradesh	5.5	2.2
Maharashtra	3.6	1
Manipur	1.6	3.2
Orissa	1.7	1.9
Other North Eastern States	4	3.5
Punjab + Chandigarh	6.8	3.1
Rajasthan	1.5	1.7
Sikkim	5	3.4
Tamil Nadu + Puducherry	9.2	8.9
Uttar Pradesh	1.5	1.8
Uttarakhand	1.8	1.2
West Bengal + Andaman & Nicobar Islands	7.4	1.8

## Sheet: Number commercial partners
state	1	2	>3
Andhra Pradesh	56.2	32.8	11
Assam	63.8	12.4	23.8
Bihar	48	48.3	3.7
Chhattisgarh	46.7	21.6	31.7
Delhi	58.6	21.3	20.1
Goa + Daman & Diu	73.7	15.1	11.2
Gujarat + Dadra & Nagar Haveli	50.5	24.8	24.7
Haryana	58.2	17.8	24
Himachal Pradesh	18.8	35	46.2
Jammu & Kashmir	47.6	30.6	21.8
Jharkhand	53.3	25.7	21
Karnataka	44.9	28	27
Kerala + Lakshadweep	35.3	27.9	36.8
Madhya Pradesh	44.6	13.7	41.7
Maharashtra	49	13.6	37.4
Manipur	26.9	35	38.1
Orissa	74.3	16.5	9.2
Other North Eastern States	28	35.1	36.9
Punjab + Chandigarh	64.3	19.2	16.5
Rajasthan	48.1	32.5	19.4
Sikkim	75.7	18.1	6.2
Tamil Nadu + Puducherry	27.7	35.6	36.7
Uttar Pradesh	54.3	24.1	21.6
Uttarakhand	56.5	22	21.5
West Bengal + Andaman & Nicobar Islands	53.3	25.5	21.2
